# Supplementary material
Source: PubMed Central journal article supplement (PMC3137067)
Supplement: supp_M111.241208_jbc.M111.241208-1.pdf [file supp_M111.241208_jbc.M111.241208-1.pdf]

## **Supplemental Data**

An analysis of a single-stranded DNA scanning process in which AID deaminates C to U haphazardly and inefficiently to ensure mutational diversity

*Phuong Pham, Peter Calabrese, Soo Jung Park, and Myron F. Goodman*

Departments of Biological Sciences and Chemistry, Molecular and Computational Biology Section,  
University of Southern California, Los Angeles, California 90089-2910, USA

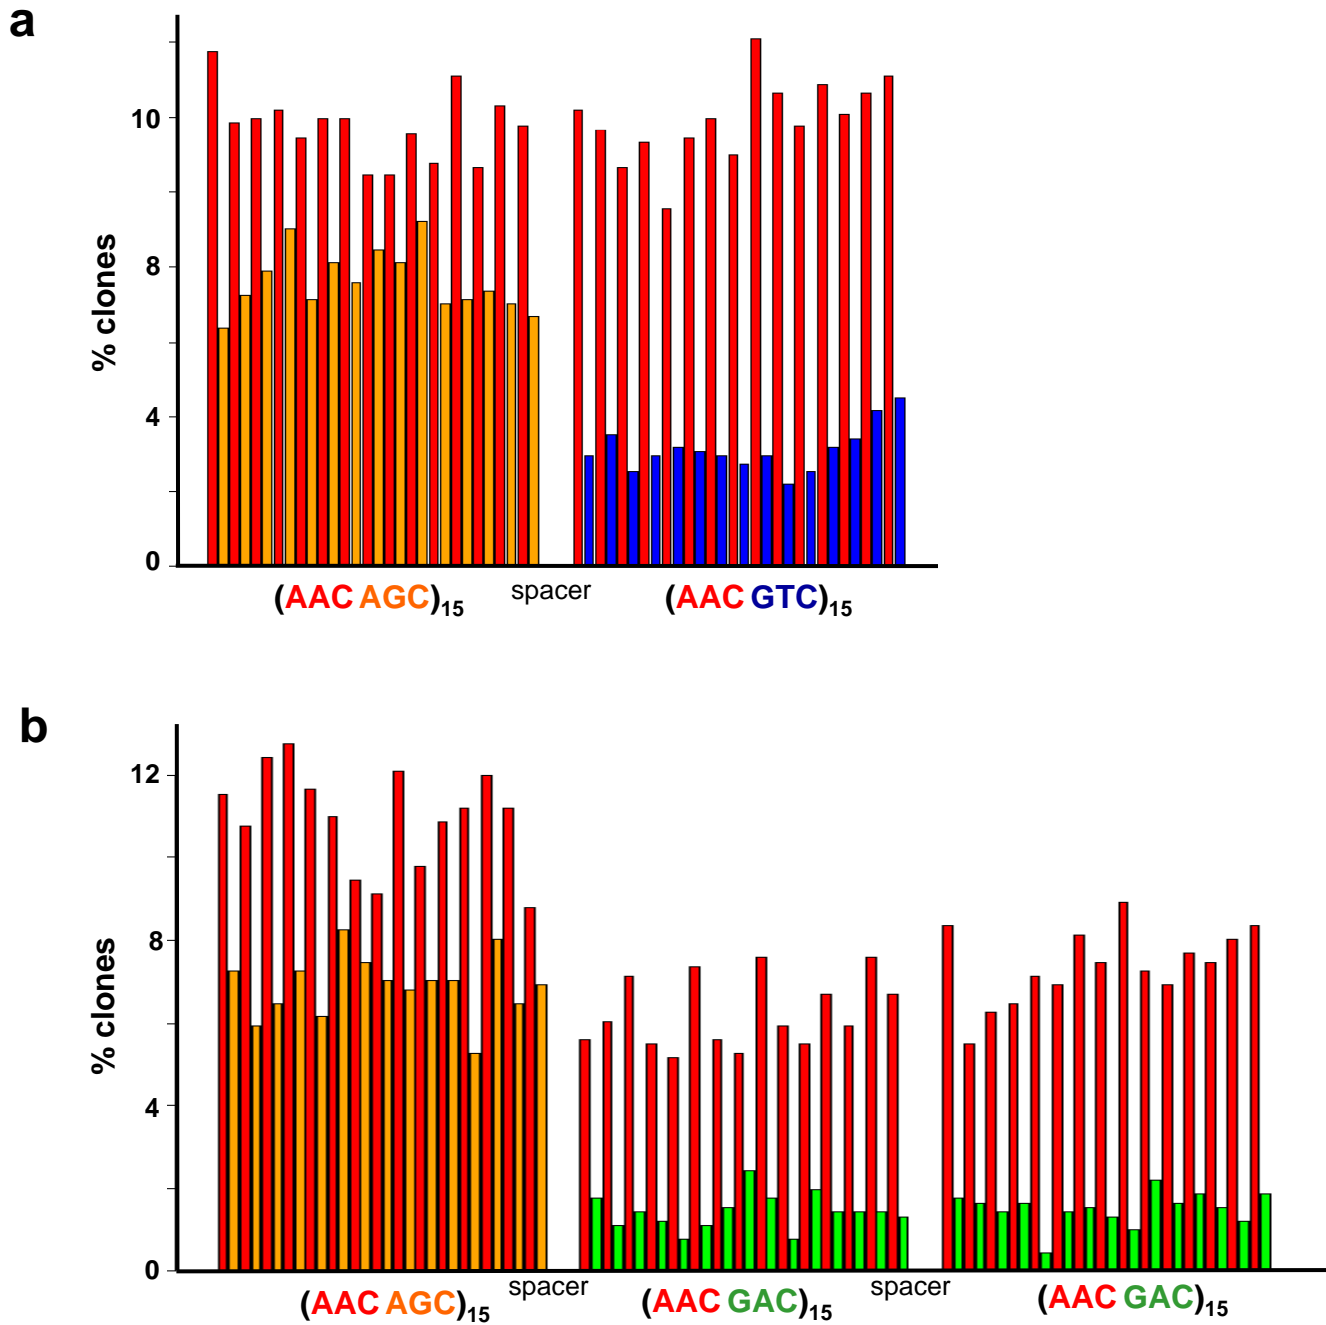

**Supplemental Figure S1.** Simulations of the modified random walk model based on 6 nt deamination motifs. **a**, Simulated mutation spectrum for  $(\text{AAC AGC})_{15}$ - $(\text{AAC GTC})_{15}$  construct. **b**, Simulated mutation spectrum for  $(\text{AAC AGC})_{15}$ - $(\text{AAC GAC})_{15}$ - $(\text{AAC GAC})_{15}$  construct. Parameters used for simulation are: Average sliding distance 30 nt, motif deamination probabilities:  $\text{AGCAAC}$  3%,  $\text{AACAGC}$  1.7%,  $\text{GTCAAC}$  3%,  $\text{AACGTC}$  0.75%,  $\text{GACAAAC}$  1.5%,  $\text{AACGAC}$  0.3%. C is the deamination target site.

**Supplemental Table S1.** Comparison of cluster patterns in the (AAC AGC)<sub>15</sub> cassette in the absence and presence of salt (150 mM NaCl)

| Mutations/clone | Cluster          | Mutation clusters (%) |      |      |      |     |     |     |     |     |     |  |
|-----------------|------------------|-----------------------|------|------|------|-----|-----|-----|-----|-----|-----|--|
|                 |                  | 1                     | 2    | 3    | 4    | 5   | 6   | 7   | 8   | 9   | 10  |  |
| 2               | No salt (209)*   | 92.8                  | 7.2  |      |      |     |     |     |     |     |     |  |
| 2               | 150 mM NaCl (58) | 91.6                  | 8.4  |      |      |     |     |     |     |     |     |  |
| 3               | No salt (113)    | 87.6                  | 11.4 | 1.0  |      |     |     |     |     |     |     |  |
| 3               | 150 mM NaCl (26) | 81.5                  | 16.9 | 1.5  |      |     |     |     |     |     |     |  |
| 4               | No salt (64)     | 77.0                  | 19.0 | 3.0  | 1.0  |     |     |     |     |     |     |  |
| 4               | 150 mM NaCl (35) | 74.3                  | 20.0 | 3.8  | 1.9  |     |     |     |     |     |     |  |
| 5               | No salt (55)     | 71.1                  | 23.9 | 2.5  | 2.0  | 0.5 |     |     |     |     |     |  |
| 5               | 150 mM NaCl (10) | 76.3                  | 15.8 | 7.9  | 0.0  | 0.0 |     |     |     |     |     |  |
| 6               | No salt (37)     | 67.3                  | 24.4 | 7.1  | 1.3  | 0.0 | 0.0 |     |     |     |     |  |
| 6               | 150 mM NaCl (13) | 76.7                  | 18.3 | 3.3  | 1.7  | 0.0 | 0.0 |     |     |     |     |  |
| 7               | No salt (27)     | 62.1                  | 25.0 | 11.3 | 1.6  | 0.0 | 0.0 | 0.0 |     |     |     |  |
| 7               | 150 mM NaCl (6)  | 69.2                  | 7.7  | 19.2 | 0.0  | 3.8 | 0.0 | 0.0 |     |     |     |  |
| 8               | No salt (19)     | 57.4                  | 29.8 | 7.4  | 4.3  | 1.1 | 0.0 | 0.0 | 0.0 |     |     |  |
| 8               | 150 mM NaCl (12) | 58.2                  | 27.3 | 3.6  | 3.6  | 7.3 | 0.0 | 0.0 | 0.0 |     |     |  |
| 9               | No salt (16)     | 48.7                  | 28.9 | 11.8 | 6.6  | 2.6 | 1.3 | 0.0 | 0.0 | 0.0 |     |  |
| 9               | 150 mM NaCl (3)  | 58.3                  | 0.0  | 8.3  | 25.0 | 8.3 | 0.0 | 0.0 | 0.0 | 0.0 |     |  |
| 10              | No salt (12)     | 49.2                  | 25.4 | 11.9 | 3.4  | 6.8 | 3.4 | 0.0 | 0.0 | 0.0 | 0.0 |  |
| 10              | 150 mM NaCl (4)  | 63.6                  | 18.2 | 9.1  | 0.0  | 4.5 | 0.0 | 4.5 | 0.0 | 0.0 | 0.0 |  |

\* Numbers in parentheses are the number of sequenced clones. Some of the rows show larger discrepancies than in **Tables 1** and **2** in the manuscript, which can be attributed to the small number of clones.

**Supplemental Table S2.** Distribution of distances between mutated motifs in the (AAC AGC)<sub>15</sub> cassette in the absence and presence of salt (150 mM NaCl)

|                 |                  | Distribution of distance between mutated motifs (%) |      |      |      |      |         |          |          |          |
|-----------------|------------------|-----------------------------------------------------|------|------|------|------|---------|----------|----------|----------|
| Mutations/clone |                  | 0                                                   | 1    | 2    | 3    | 4    | 5 to 10 | 11 to 15 | 16 to 20 | 21 to 29 |
| 2               | No salt (209)*   | 2.4                                                 | 11.0 | 5.7  | 9.1  | 4.8  | 27.8    | 19.1     | 12.4     | 7.7      |
| 2               | 150 mM NaCl (58) | 8.6                                                 | 6.9  | 3.4  | 6.9  | 10.3 | 25.9    | 19.0     | 10.3     | 8.6      |
| 3               | No salt (113)    | 8.8                                                 | 8.8  | 5.3  | 9.3  | 8.4  | 31.4    | 20.4     | 5.8      | 1.8      |
| 3               | 150 mM NaCl (26) | 15.4                                                | 9.6  | 9.6  | 5.8  | 3.8  | 36.5    | 9.6      | 7.7      | 1.9      |
| 4               | No salt (64)     | 14.6                                                | 14.6 | 6.8  | 8.9  | 6.3  | 31.8    | 16.1     | 1.0      | 0.0      |
| 4               | 150 mM NaCl (35) | 16.2                                                | 17.1 | 7.6  | 10.5 | 9.5  | 28.6    | 8.6      | 1.9      | 0.0      |
| 5               | No salt (55)     | 15.9                                                | 17.7 | 9.5  | 12.7 | 6.4  | 25.9    | 10.5     | 1.4      | 0.0      |
| 5               | 150 mM NaCl (10) | 15.0                                                | 15.0 | 7.5  | 2.5  | 7.5  | 42.5    | 10.0     | 0.0      | 0.0      |
| 6               | No salt (37)     | 15.1                                                | 20.5 | 8.6  | 11.4 | 16.2 | 23.8    | 3.8      | 0.5      | 0.0      |
| 6               | 150 mM NaCl (13) | 15.4                                                | 12.3 | 12.3 | 18.5 | 7.7  | 30.8    | 3.1      | 0.0      | 0.0      |
| 7               | No salt (27)     | 16.7                                                | 23.5 | 13.6 | 8.6  | 7.4  | 27.8    | 2.5      | 0.0      | 0.0      |
| 7               | 150 mM NaCl (6)  | 33.3                                                | 11.1 | 11.1 | 16.7 | 8.3  | 16.7    | 2.8      | 0.0      | 0.0      |
| 8               | No salt (19)     | 21.8                                                | 21.8 | 11.3 | 12.0 | 12.0 | 20.3    | 0.8      | 0.0      | 0.0      |
| 8               | 150 mM NaCl (12) | 16.7                                                | 32.1 | 7.1  | 15.5 | 11.9 | 16.7    | 0.0      | 0.0      | 0.0      |
| 9               | No salt (16)     | 25.8                                                | 27.3 | 12.5 | 9.4  | 5.5  | 19.5    | 0.0      | 0.0      | 0.0      |
| 9               | 150 mM NaCl (3)  | 12.5                                                | 50.0 | 0.0  | 12.5 | 4.2  | 20.8    | 0.0      | 0.0      | 0.0      |
| 10              | No salt (12)     | 30.6                                                | 25.9 | 12.0 | 13.9 | 5.6  | 12.0    | 0.0      | 0.0      | 0.0      |
| 10              | 150 mM NaCl (4)  | 22.2                                                | 27.8 | 27.8 | 13.9 | 2.8  | 5.6     | 0.0      | 0.0      | 0.0      |

\* Numbers in parentheses are the number of sequenced clones. Some of the rows show larger discrepancies than in **Tables 1** and **2** in the manuscript, which can be attributed to the small number of clones.

**Supplemental Table S3.** Comparison of cluster patterns in three cassettes (AAC AGC)<sub>15</sub>, (AAC GAC)<sub>15</sub> and (AAC GTC)<sub>15</sub>

| Mutations/clone | Cluster                        | Mutation clusters (%) |      |      |      |     |     |     |     |     |      |     |
|-----------------|--------------------------------|-----------------------|------|------|------|-----|-----|-----|-----|-----|------|-----|
|                 |                                | 1                     | 2    | 3    | 4    | 5   | 6   | 7   | 8   | 9   | 10   |     |
| 2               | (AAC AGC) <sub>15</sub> (209)* | 92.8                  | 7.2  |      |      |     |     |     |     |     |      |     |
| 2               | (AAC GAC) <sub>15</sub> (57)   | 94.4                  | 5.6  |      |      |     |     |     |     |     |      |     |
| 2               | (AAC GTC) <sub>15</sub> (30)   | 92.9                  | 7.1  |      |      |     |     |     |     |     |      |     |
| 3               | (AAC AGC) <sub>15</sub> (113)  | 87.6                  | 11.4 | 1.0  |      |     |     |     |     |     |      |     |
| 3               | (AAC GAC) <sub>15</sub> (23)   | 82.8                  | 15.5 | 1.7  |      |     |     |     |     |     |      |     |
| 3               | (AAC GTC) <sub>15</sub> (26)   | 85.1                  | 13.4 | 1.5  |      |     |     |     |     |     |      |     |
| 4               | (AAC AGC) <sub>15</sub> (64)   | 77.0                  | 19.0 | 3.0  | 1.0  |     |     |     |     |     |      |     |
| 4               | (AAC GAC) <sub>15</sub> (9)    | 75.0                  | 21.4 | 3.6  | 0.0  |     |     |     |     |     |      |     |
| 4               | (AAC GTC) <sub>15</sub> (15)   | 77.1                  | 20.8 | 2.1  | 0.0  |     |     |     |     |     |      |     |
| 5               | (AAC AGC) <sub>15</sub> (55)   | 71.1                  | 23.9 | 2.5  | 2.0  | 0.5 |     |     |     |     |      |     |
| 5               | (AAC GAC) <sub>15</sub> (5)    | 58.8                  | 35.3 | 5.9  | 0.0  | 0.0 |     |     |     |     |      |     |
| 5               | (AAC GTC) <sub>15</sub> (8)    | 50.0                  | 36.4 | 4.5  | 0.0  | 9.1 |     |     |     |     |      |     |
| 6               | (AAC AGC) <sub>15</sub> (37)   | 67.3                  | 24.4 | 7.1  | 1.3  | 0.0 | 0.0 |     |     |     |      |     |
| 6               | (AAC GAC) <sub>15</sub> (2)    | 66.7                  | 33.3 | 0.0  | 0.0  | 0.0 | 0.0 |     |     |     |      |     |
| 6               | (AAC GTC) <sub>15</sub> (9)    | 61.8                  | 20.6 | 14.7 | 2.9  | 0.0 | 0.0 |     |     |     |      |     |
| 7               | (AAC AGC) <sub>15</sub> (27)   | 62.1                  | 25.0 | 11.3 | 1.6  | 0.0 | 0.0 | 0.0 |     |     |      |     |
| 7               | (AAC GAC) <sub>15</sub> (3)    | 69.2                  | 0.0  | 30.8 | 0.0  | 0.0 | 0.0 | 0.0 |     |     |      |     |
| 7               | (AAC GTC) <sub>15</sub> (5)    | 45.0                  | 40.0 | 10.0 | 5.0  | 0.0 | 0.0 | 0.0 |     |     |      |     |
| 8               | (AAC AGC) <sub>15</sub> (19)   | 57.4                  | 29.8 | 7.4  | 4.3  | 1.1 | 0.0 | 0.0 | 0.0 |     |      |     |
| 8               | (AAC GAC) <sub>15</sub> (1)    | 25.0                  | 50.0 | 25.0 | 0.0  | 0.0 | 0.0 | 0.0 | 0.0 |     |      |     |
| 8               | (AAC GTC) <sub>15</sub> (9)    | 40.0                  | 31.4 | 17.1 | 5.7  | 5.7 | 0.0 | 0.0 | 0.0 |     |      |     |
| 9               | (AAC AGC) <sub>15</sub> (16)   | 48.7                  | 28.9 | 11.8 | 6.6  | 2.6 | 1.3 | 0.0 | 0.0 | 0.0 |      |     |
| 9               | (AAC GAC) <sub>15</sub> (0)    | 0.0                   | 0.0  | 0.0  | 0.0  | 0.0 | 0.0 | 0.0 | 0.0 | 0.0 |      |     |
| 9               | (AAC GTC) <sub>15</sub> (8)    | 52.8                  | 22.2 | 2.8  | 16.7 | 5.6 | 0.0 | 0.0 | 0.0 | 0.0 |      |     |
| 10              | (AAC AGC) <sub>15</sub> (12)   | 49.2                  | 25.4 | 11.9 | 3.4  | 6.8 | 3.4 | 0.0 | 0.0 | 0.0 | 0.0  |     |
| 10              | (AAC GAC) <sub>15</sub> (2)    | 62.5                  | 12.5 | 0.0  | 12.5 | 0.0 | 0.0 | 0.0 | 0.0 | 0.0 | 12.5 | 0.0 |
| 10              | (AAC GTC) <sub>15</sub> (3)    | 30.8                  | 38.5 | 7.7  | 15.4 | 7.7 | 0.0 | 0.0 | 0.0 | 0.0 | 0.0  | 0.0 |

\* Numbers in parentheses are the number of sequenced clones. Some of the rows show larger discrepancies than in **Tables 1** and **2** in the manuscript, which can be attributed to the small number of clones.

**Supplemental Table S4.** Distribution of distances between mutated motifs in three cassettes (AAC AGC)<sub>15</sub>, (AAC GAC)<sub>15</sub> and (AAC GTC)<sub>15</sub>

|                 |                                | Distribution of distance between mutated motifs (%) |      |      |      |      |         |          |          |          |
|-----------------|--------------------------------|-----------------------------------------------------|------|------|------|------|---------|----------|----------|----------|
| Mutations/clone |                                | 0                                                   | 1    | 2    | 3    | 4    | 5 to 10 | 11 to 15 | 16 to 20 | 21 to 28 |
| 2               | (AAC AGC) <sub>15</sub> (209)* | 2.4                                                 | 11.0 | 5.7  | 9.1  | 4.8  | 27.8    | 19.1     | 12.4     | 7.7      |
| 2               | (AAC GAC) <sub>15</sub> (57)   | 1.8                                                 | 8.8  | 3.5  | 5.3  | 5.3  | 36.8    | 19.3     | 12.3     | 7.0      |
| 2               | (AAC GTC) <sub>15</sub> (30)   | 3.3                                                 | 10.0 | 0.0  | 16.7 | 0.0  | 36.7    | 20.0     | 10.0     | 3.3      |
| 3               | (AAC AGC) <sub>15</sub> (113)  | 8.8                                                 | 8.8  | 5.3  | 9.3  | 8.4  | 31.4    | 20.4     | 5.8      | 1.8      |
| 3               | (AAC GAC) <sub>15</sub> (23)   | 6.5                                                 | 17.4 | 4.3  | 23.9 | 4.3  | 28.3    | 10.9     | 4.3      | 0.0      |
| 3               | (AAC GTC) <sub>15</sub> (26)   | 3.8                                                 | 17.3 | 1.9  | 11.5 | 0.0  | 42.3    | 17.3     | 5.8      | 0.0      |
| 4               | (AAC AGC) <sub>15</sub> (64)   | 14.6                                                | 14.6 | 6.8  | 8.9  | 6.3  | 31.8    | 16.1     | 1.0      | 0.0      |
| 4               | (AAC GAC) <sub>15</sub> (9)    | 18.5                                                | 11.1 | 7.4  | 11.1 | 3.7  | 33.3    | 11.1     | 3.7      | 0.0      |
| 4               | (AAC GTC) <sub>15</sub> (15)   | 8.9                                                 | 17.8 | 2.2  | 13.3 | 8.9  | 42.2    | 6.7      | 0.0      | 0.0      |
| 5               | (AAC AGC) <sub>15</sub> (55)   | 15.9                                                | 17.7 | 9.5  | 12.7 | 6.4  | 25.9    | 10.5     | 1.4      | 0.0      |
| 5               | (AAC GAC) <sub>15</sub> (5)    | 10.0                                                | 30.0 | 0.0  | 30.0 | 0.0  | 25.0    | 0.0      | 0.0      | 5.0      |
| 5               | (AAC GTC) <sub>15</sub> (8)    | 12.5                                                | 43.8 | 3.1  | 15.6 | 3.1  | 18.8    | 3.1      | 0.0      | 0.0      |
| 6               | (AAC AGC) <sub>15</sub> (37)   | 15.1                                                | 20.5 | 8.6  | 11.4 | 16.2 | 23.8    | 3.8      | 0.5      | 0.0      |
| 6               | (AAC GAC) <sub>15</sub> (2)    | 0.0                                                 | 30.0 | 10.0 | 30.0 | 0.0  | 20.0    | 10.0     | 0.0      | 0.0      |
| 6               | (AAC GTC) <sub>15</sub> (9)    | 15.6                                                | 28.9 | 6.7  | 17.8 | 0.0  | 26.7    | 4.4      | 0.0      | 0.0      |
| 7               | (AAC AGC) <sub>15</sub> (27)   | 16.7                                                | 23.5 | 13.6 | 8.6  | 7.4  | 27.8    | 2.5      | 0.0      | 0.0      |
| 7               | (AAC GAC) <sub>15</sub> (3)    | 11.1                                                | 33.3 | 5.6  | 27.8 | 5.6  | 16.7    | 0.0      | 0.0      | 0.0      |
| 7               | (AAC GTC) <sub>15</sub> (5)    | 6.7                                                 | 43.3 | 6.7  | 16.7 | 6.7  | 20.0    | 0.0      | 0.0      | 0.0      |
| 8               | (AAC AGC) <sub>15</sub> (19)   | 21.8                                                | 21.8 | 11.3 | 12.0 | 12.0 | 20.3    | 0.8      | 0.0      | 0.0      |
| 8               | (AAC GAC) <sub>15</sub> (1)    | 14.3                                                | 42.9 | 14.3 | 28.6 | 0.0  | 0.0     | 0.0      | 0.0      | 0.0      |
| 8               | (AAC GTC) <sub>15</sub> (9)    | 12.7                                                | 46.0 | 4.8  | 22.2 | 1.6  | 12.7    | 0.0      | 0.0      | 0.0      |
| 9               | (AAC AGC) <sub>15</sub> (16)   | 25.8                                                | 27.3 | 12.5 | 9.4  | 5.5  | 19.5    | 0.0      | 0.0      | 0.0      |
| 9               | (AAC GAC) <sub>15</sub> (0)    | 0.0                                                 | 0.0  | 0.0  | 0.0  | 0.0  | 0.0     | 0.0      | 0.0      | 0.0      |
| 9               | (AAC GTC) <sub>15</sub> (8)    | 15.6                                                | 40.6 | 9.4  | 18.8 | 9.4  | 6.3     | 0.0      | 0.0      | 0.0      |
| 10              | (AAC AGC) <sub>15</sub> (12)   | 30.6                                                | 25.9 | 12.0 | 13.9 | 5.6  | 12.0    | 0.0      | 0.0      | 0.0      |
| 10              | (AAC GAC) <sub>15</sub> (2)    | 27.8                                                | 38.9 | 5.6  | 16.7 | 0.0  | 5.6     | 5.6      | 0.0      | 0.0      |
| 10              | (AAC GTC) <sub>15</sub> (3)    | 29.6                                                | 33.3 | 11.1 | 11.1 | 7.4  | 7.4     | 0.0      | 0.0      | 0.0      |

\* Numbers in parentheses are the number of sequenced clones. Some of the rows show larger discrepancies than in **Tables 1** and **2** in the manuscript, which can be attributed to the small number of clones.
